# Supplementary material
Source: HighWire-hosted journal article supplement (https://gut.bmj.com/content/67/6/1033)
Supplement: inline-supplementary-material-2 [file inline-supplementary-material-2.pdf]

Appendix Table 2. List of Participants and their Affiliations at the Time of Study

|                    |                                                                                                   |
|--------------------|---------------------------------------------------------------------------------------------------|
| Eizi Araki         | - Sapporo Central Hospital, Sapporo                                                               |
| Takatomi Oku       | - Hokkaido Iryoudan Obihiro Daiichi Hospital, Obihiro                                             |
| Mutsubu Sugawara   | - Higashiasahikawa Hospital, Asahikawa                                                            |
| Tsuyotoshi Tsuji   | - Akita City Hospital, Akita                                                                      |
| Yasushi Matsumoto  | - Kohnan Hospital, Sendai                                                                         |
| Shinji Kumagai     | - Nakajima Hospital, Sendai                                                                       |
| Tsuyoshi Shinozaki | - National Hospital Organization Sendai Medical Center, Sendai                                    |
| Katsunori Iijima   | - Tohoku University School of Medicine, Akita                                                     |
| Kazuhiko Aikawa    | - Igarashi Internal Medicine Surgery Clinic, Kooriyama                                            |
| Noriyuki Nishino   | - Southern Tohoku Research Institute for Neuroscience Southern Tohoku General Hospital, Kooriyama |
| Taku Matsubara     | - Shinrakuen Hospital, Niigata                                                                    |
| Hitoshi Takagi     | - National Hospital Organization Takasaki General Medical Center, Takasaki                        |
| Masataka Fukue     | - Koga Hospital, Koga                                                                             |
| Masaaki Kanenobu   | - Yuai Memorial Hospital, Koga                                                                    |
| Keita Uehara       | - National Hospital Organization Tochigi Medical Center, Utsunomiya                               |
| Koichi Taya        | - Taya Clinic, Tsuchiura                                                                          |
| Masao Kobayakawa   | - National Center for Global Health and Medicine, Tokyo                                           |
| Hisato Maekawa     | - Tokyo Takanawa Hospital, Tokyo                                                                  |
| Hironori Kowazaki  | - Kohsei Chuo General hospital, Tokyo                                                             |
| Manabu Yamamoto    | - Adachi Kyosai Hospital, Tokyo                                                                   |
| Nobuhiko Harada    | - Hachioji Digestive Disease Hospital, Tokyo                                                      |
| Yukiko Morita      | - National Hospital Organization Sagamihara National Hospital, Sagamihara                         |
| Jun Takatsuka      | - Sagamihara Central Hospital, Sagamihara                                                         |
| Ryosaku Azemoto    | - Kimitsu Chuo Hospital, Kisarazu                                                                 |
| Seiji Otsuka       | - Nippon Koukan Hospital, Kawasaki                                                                |
| Akira Mizuki       | - Keiyu Hospital, Yokohama                                                                        |
| Terue Sakakibara   | - Sakakibara Clinic, Yokohama                                                                     |
| Kiyoshi Ido        | - Yokohama Shintoshu Neurosurgical Hospital, Sagamihara                                           |
| Nobuaki Shinozaki  | - Shonan Atsugi Hospital, Fujisawa                                                                |

|                       |                                                                               |
|-----------------------|-------------------------------------------------------------------------------|
| Shigetaka Tounou      | - New Tokyo Clinic, Ichihara                                                  |
| Naomi Uemura          | - Kohnodai Hospital, National Center for Global Health and Medicine, Ichikawa |
| Masahiko Saito        | - Kumagaya General Hospital, Kumagaya                                         |
| Masahiko Ohata        | - Maruyama Memorial General Hospital, Saitama                                 |
| Ko Nishikawa          | - Ageo Central General Hospital, Ageo                                         |
| Masaya Sato           | - San-ai Hospital, Saitama                                                    |
| Masanori Takenoya     | - Ogawa Red Cross Hospital, Hiki                                              |
| Keiichi Morita        | - Tosei General Hospital, Seto                                                |
| Toshimasa Asai        | - Asai Hospital, Seto                                                         |
| Taizo Kondo           | - Komaki City Hospital, Tajimi                                                |
| Toshiyuki Noda        | - Gifu Prefectural General Medical Center, Gifu                               |
| Hiroshi Hasegawa      | - National Hospital Organization Mie-Chuo Medical Center, Tsu                 |
| Kiyoshi Ashida        | - Osaka Saiseikai Nakatsu Hospital, Osaka                                     |
| Hirohisa Tanimura     | - Osaka Kaisei Hospital, Osaka                                                |
| Toshifumi Ito         | - Japan Community Healthcare Organization Osaka Hospital, Osaka               |
| Hideji Nakamura       | - Nissay Hospital, Osaka                                                      |
| Sanai Noguchi         | - Aizenbashi Hospital, Osaka                                                  |
| Kazuho Miyakoshi      | - Minamiosaka General Hospital, Osaka                                         |
| Takeshi Kubota        | - Tondabayashi Hospital, Osaka Prefecture Branch of Saiseikai, Tondabayashi   |
| Tatsuichi Ahn         | - Bellland General Hospital, Sakai                                            |
| Kimio Nishimura       | - Takanojima Central Hospital, Nara                                           |
| Shuji Takahashi       | - Takeda Hospital, Kyoto                                                      |
| Hidemitsu Sugimoto    | - Mitsubishi Kyoto Hospital, Kadoma                                           |
| Kiichi Matsuyama      | - Takeda General Hospital, Kyoto                                              |
| Yasuhiro Katou        | - Komatsu Sophia Hospital, Komatsu                                            |
| Toshinori Higashikata | - Komatsu Municipal Hospital, Komatsu                                         |
| Kiyoo Mori            | - Houju Memorial Hospital, Nomi                                               |
| Satoru Sakagami       | - National Hospital Organization Kanazawa Medical Center, Kanazawa            |
| Hiroyuki Oda          | - Central Hospital of Matto Ishikawa, Hakusan                                 |
| Shigeru Yokawa        | - Toyama City Hospital, Toyama                                                |
| Atsushi Sueyoshi      | - Uji Tokusyukai Medical Center, Uji                                          |

|                    |                                                                     |
|--------------------|---------------------------------------------------------------------|
| Naoki Wakabayashi  | - Otsu Municipal Hospital, Otsu                                     |
| Tetsuro Tsuji      | - Fukui General Clinic, Fukui                                       |
| Takahiko Aoyama    | - Fukui Prefectural Hospital, Fukui                                 |
| Yasuo Sutani       | - Kobe Tokushukai Hospital, Kobe                                    |
| Yorihiko Higashino | - Higashi Takarazuka Satoh Hospital, Takarazuka                     |
| Eitatsu Arai       | - Nishinomiya Kyoritsu Neurosurgical Hospital, Nishinomiya          |
| Hiroyuki Ogawa     | - Nishinomiya Municipal Central Hospital, Nishinomiya               |
| Masaaki Sumioka    | - Hiroshima Prefectural Hospital, Hiroshima                         |
| Shouichi Tanaka    | - National Hospital Organization Iwakuni Clinical Center, Iwakuni   |
| Hironao Komatsu    | - JA Hiroshima General Hospital, Hatsukaichi                        |
| Yuhji Furutani     | - National Hospital Organization Kanmon Medical Center, Shimonoseki |
| Tatsuya Toyokawa   | - National Hospital Organization Fukuyama Medical Center, Fukuyama  |
| Mitsunori Fujimura | - Takamatsu Municipal Hospital, Takamatsu                           |
| Tsuyoshi Maeta     | - KKR Takamatsu Hospital, Takamatsu                                 |
| Hirofumi Nakata    | - Futaba Clinic, Kochi                                              |
| Takashi Kobayashi  | - Jyuzen General Hospital, Niihama                                  |
| Hirokazu Doi       | - Ehime Prefectural Imabari Hospital, Ozu                           |
| Tsutomu Mima       | - Saiseikai Imabari Hospital, Imabari                               |
| Yuji Mizukami      | - Matsuyama Shimin Hospital, Matsuyama                              |
| Tomoyuki Ninomiya  | - Ehime Prefectural Central Hospital, Matsuyama                     |
| Mitsuru Seo        | - Hamanomachi Hospital, Fukuoka                                     |
| Toshihiro Nakamura | - National Hospital Organization Kyushu Medical Center, Fukuoka     |
| Toshiyuki Matsui   | - Fukuoka University Chikushi hospital, Chikushino                  |
| Tatsuhiko Oishi    | - Oishi Gastroenterology Clinic, Kasuya                             |
| Haruki Takahashi   | - Obase Hospital, Miyako                                            |
| Yasunori Kyoyama   | - Shinyukhashi Hospital, Yukuhashi                                  |
| Shigeru Fujii      | - Fukuoka Shin Mizumaki Hospital, Onga                              |
| Tetsuo Hisadome    | - Shin Komonji Hospital, Kitakyushu                                 |
| Makoto Kohakura    | - Nagata Hospital, Ynagawa                                          |
| Kazuya Makiyama    | - Inoue Hospital, Nagasaki                                          |
| Syotaro Tsuruta    | - The Japanese Red Cross Nagasaki Atomic Bomb Hospital, Nagasaki    |

|                   |                                                                    |
|-------------------|--------------------------------------------------------------------|
| Kazuhiro Sugi     | - National Hospital Organization Kumamoto Medical Center, Kumamoto |
| Michiko Nakanishi | - Suizenji Tohya Hospital, Kumamoto                                |
| Hiroshi Satoh     | - Oita Oka Hospital, Oita                                          |
| Tetsuya Ishida    | - Oita Red Cross Hospital, Oita                                    |
| Tatsuhiko Ooie    | - National Hospital Organization Oita Medical Center, Oita         |
| Katsuro Kashima   | - National Hospital Organization Ibusuki Medical Center, Ibusuki   |
| Yasuo Hanamure    | - Hanamure Hospital, Ichikikushikino                               |
| Hiroshi Yoshii    | - Izumi General Medical Center, Izumi                              |
